# Supplementary material for: Tuning the degree of CO2 activation by carbon doping Cun− (n = 3–10) clusters: an IR spectroscopic study
Source: Royal Society of Chemistry journal article supplement (doi:10.1039/d2fd00128d), 2022-11-03
Supplement: d2fd00128d1.pdf [file d2fd00128d1.pdf]

## Tuning the degree of CO<sub>2</sub> activation by carbon doping Cu<sub>n</sub><sup>-</sup> (n=3-10) clusters: an IR spectroscopic study.

Olga V. Lushchikova,<sup>a,b</sup> Máté Szalay<sup>c</sup>, Tibor Höltzl<sup>c</sup>, and Joost M. Bakker<sup>a,\*</sup>

### Supporting Information

#### Contents

|                                                                                                  |    |
|--------------------------------------------------------------------------------------------------|----|
| Infrared spectra.....                                                                            | 2  |
| Computational details on finding lowest energy cluster structures and adsorbate geometries ..... | 5  |
| Dispersion correction and Cartesian coordinates.....                                             | 6  |
| References .....                                                                                 | 10 |

## Infrared spectra

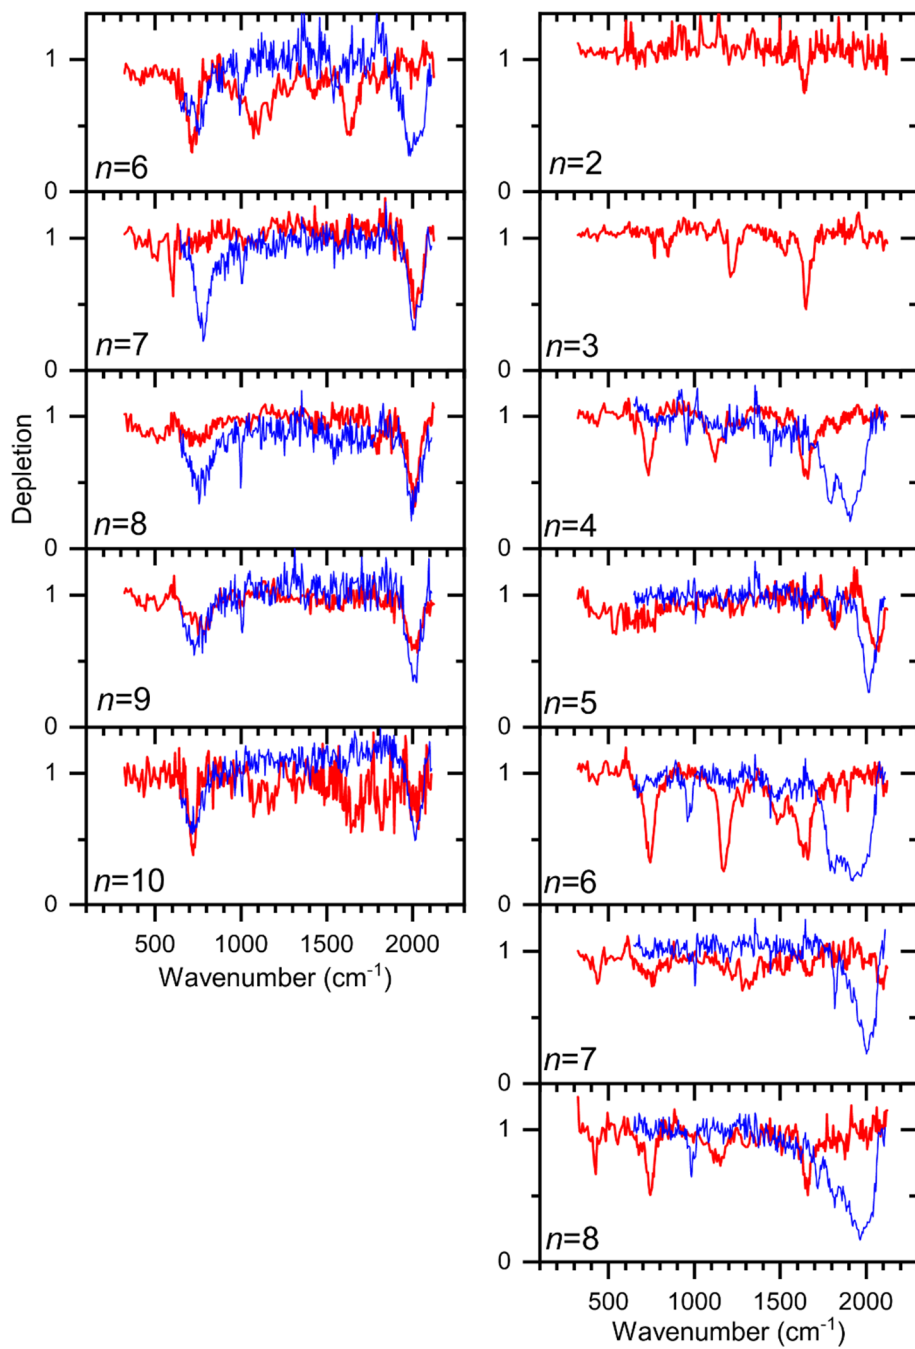

**Figure S1:** IR depletion spectra of  $\text{Cu}_n\text{C}^-$  (left) and  $\text{Cu}_n\text{C}_2^-$  (right) reacted with  $\text{CO}_2$  (red) and  $\text{CO}$  (blue).

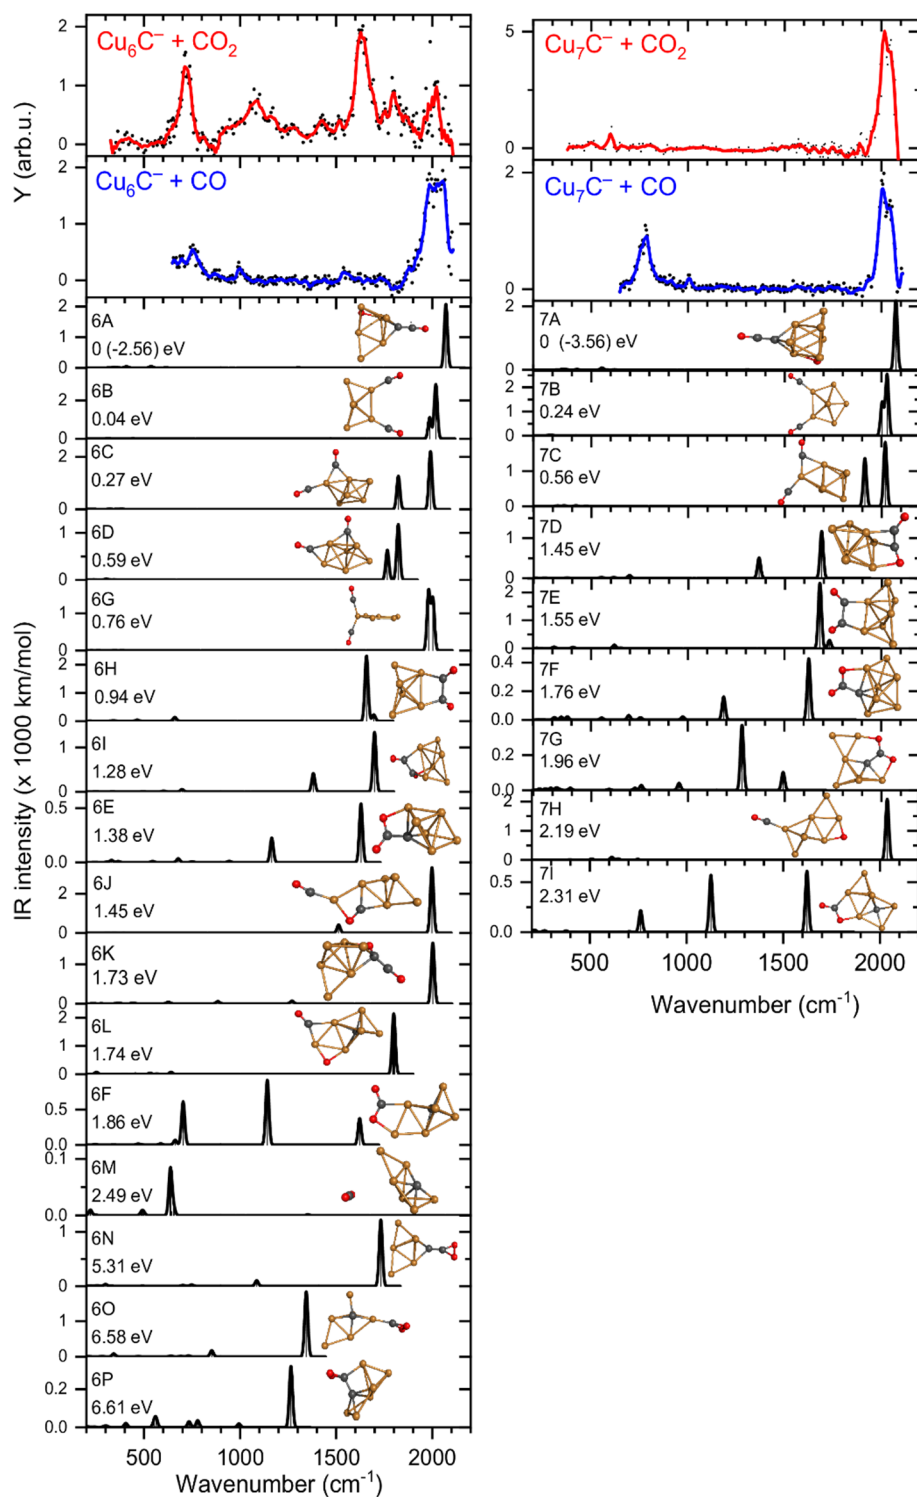

**Figure S2:** IRMPD spectra of:  $\text{Cu}_6\text{C}^-$  and  $\text{Cu}_7\text{C}^-$  reacted with  $\text{CO}_2$  (red) and  $\text{CO}$  (blue), and calculated spectra (black) of the lowest energy structures per group (see main text). All calculated spectra are convoluted with a  $20\text{ cm}^{-1}$  FWHM Gaussian line shape function, and are accompanied by the geometrical structure (copper, carbon and oxygen atoms represented by orange, black and red spheres) and relative energy. For the lowest energy structure, the energy relative to the reactants is given in parentheses.

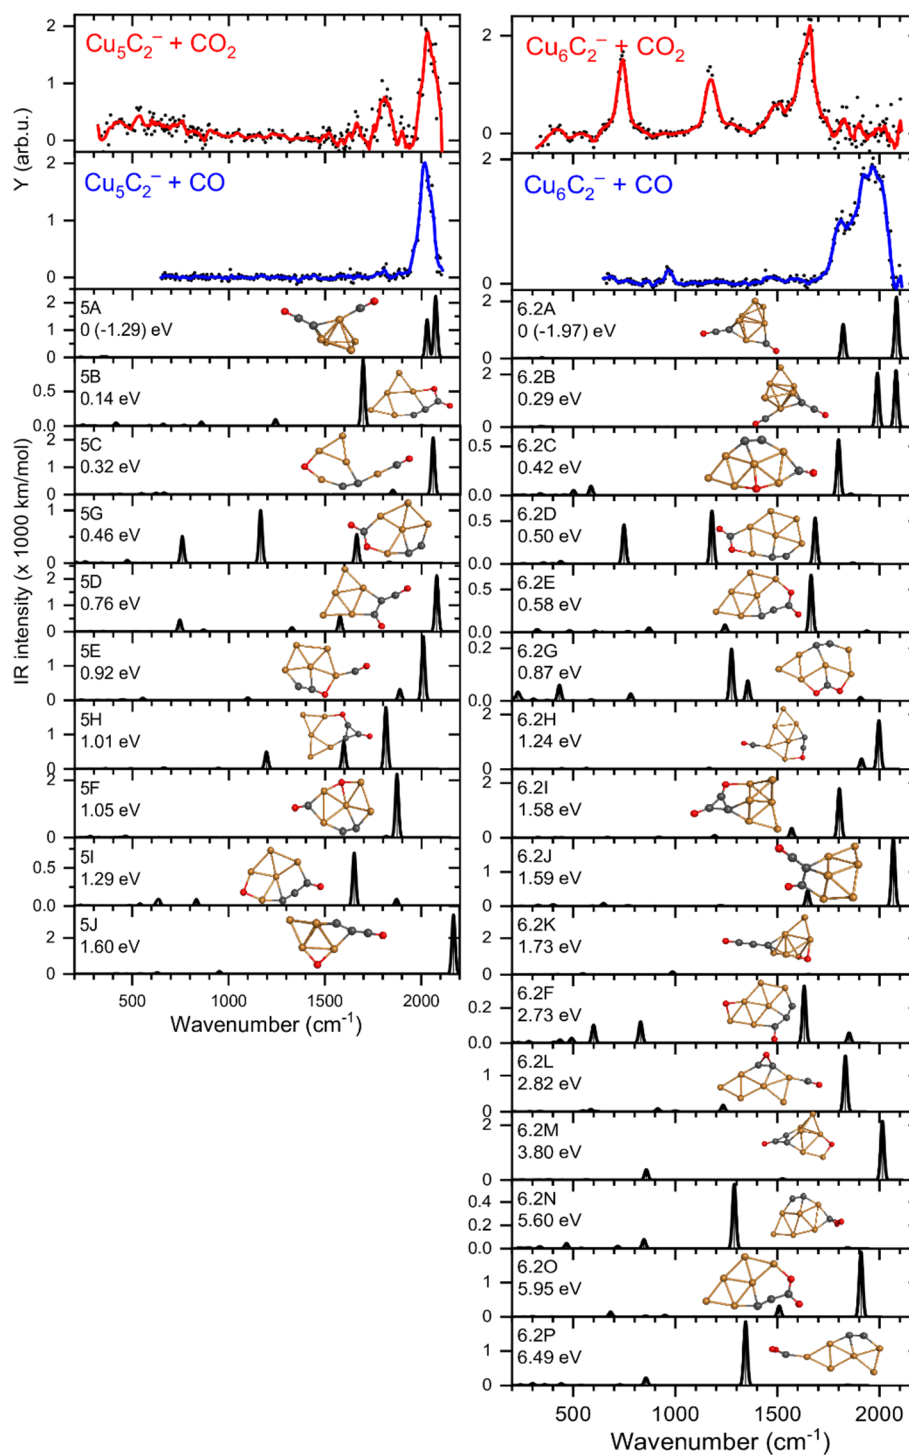

**Figure S3:** IRMPD spectra of:  $\text{Cu}_5\text{C}_2^-$  (left) and  $\text{Cu}_6\text{C}_2^-$  (right) reacted with  $\text{CO}_2$  (red) and  $\text{CO}$  (blue), and calculated spectra (black) of the lowest energy structure per group. All calculated spectra are convoluted with a 20  $\text{cm}^{-1}$  FWHM Gaussian line shape function, and are accompanied by the geometrical structure (copper, carbon and oxygen atoms represented by orange, black and red spheres) and relative energy. For the lowest energy structure, the energy relative to the reactants is given in parentheses.

## Computational details on finding lowest energy cluster structures and adsorbate geometries

Lowest energy geometries of the bare  $\text{Cu}_n\text{C}_m^-$  clusters were searched by generating several possible initial structures based on the pure copper cluster geometries, also using the capping method<sup>i</sup> and finally were systematically analyzed and confirmed using the CALYPSO method and software<sup>ii,iii,iv</sup> in conjunction with the Gaussian16<sup>v</sup> program code and employing the BP86/LANL2DZ method. The lowest energy cluster structures were re-optimized using the more accurate TPSSh/def2-TZVPD level of theory.

The target of the adsorption computations is not to locate the global minimum structure, but to explore the possible kinetically accessible adducts. The initial geometries for the cluster-adsorbate systems were systematically generated using our program based on the Molmod library,<sup>vi</sup> while the reaction paths are explored subsequently. This methodology was applied successfully in our recent works<sup>vii,viii,ix,x,xi</sup>. The investigated intact and dissociated  $\text{CO}_2$  binding motifs are depicted in Figure S5.

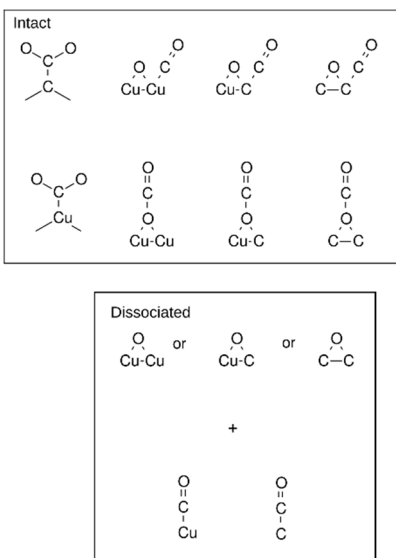

**Figure S5.** The different  $\text{CO}_2$  binding motifs used in the systematic search for the intact and dissociated adsorbate structures.

## Dispersion correction and Cartesian coordinates

**Table S1.** Reaction energies of different structures using different Grimme type dispersion corrections (Functional: TPSSh, basis: def2-TZVPD)

| Structure | No dispersion correction | D3xii,xiii | D4 <sup>xiv,xv</sup> |
|-----------|--------------------------|------------|----------------------|
| 7B        | -3.20 eV                 | -3.27 eV   | -3.32 eV             |
| 7F        | -1.08 eV                 | -1.14 eV   | -1.26 eV             |

**Table S2.** Cartesian coordinates of structures in Figure 4

| #  | XYZ Coordinates |          |          |          | #        | XYZ Coordinates |          |          |          |
|----|-----------------|----------|----------|----------|----------|-----------------|----------|----------|----------|
| 6A | Cu              | -0.14019 | -1.41229 | 0.07019  | 7A       | Cu              | -1.17134 | -0.73662 | -1.15087 |
|    | Cu              | -1.52845 | 0.52908  | -0.46114 |          | Cu              | 2.13669  | 1.67738  | -0.16636 |
|    | Cu              | 1.36315  | 0.30117  | 1.24278  |          | Cu              | 0.28853  | -2.00534 | 0.44259  |
|    | Cu              | -2.51118 | -1.45602 | 0.34256  |          | Cu              | -1.24330 | -0.31802 | 1.31892  |
|    | Cu              | 0.88017  | 0.51897  | -1.12456 |          | C               | -2.11219 | 0.66885  | -0.19721 |
|    | Cu              | 0.11836  | 2.27877  | 0.52110  |          | Cu              | 1.31063  | -0.35842 | -1.10547 |
|    | C               | 1.75444  | -0.97568 | -0.23157 |          | Cu              | -0.24274 | 1.35737  | -0.21329 |
|    | C               | 2.74758  | -1.79812 | -0.35067 |          | Cu              | 1.14684  | 0.00293  | 1.41039  |
|    | O               | 3.66293  | -2.54771 | -0.46589 |          | C               | -3.25226 | 1.27995  | -0.18431 |
|    | O               | -0.44870 | 1.87418  | -1.23960 |          | O               | -4.30511 | 1.83232  | -0.16550 |
|    |                 |          |          | O        | 0.26169  | -1.91380        | -1.49105 |          |          |
| 6B | Cu              | 0.82808  | 0.01958  | -1.22528 | 7B       | Cu              | 0.41720  | 0.00005  | -1.24980 |
|    | Cu              | -0.78657 | -1.29009 | 0.12820  |          | Cu              | 1.18402  | -1.95163 | -0.00163 |
|    | Cu              | 0.85851  | 0.02525  | 1.24873  |          | Cu              | 1.13704  | 1.96948  | -0.00025 |
|    | Cu              | 1.52506  | -1.97227 | -0.07564 |          | Cu              | -1.22704 | -1.28252 | -0.00026 |
|    | Cu              | 1.41512  | 2.05061  | -0.08319 |          | C               | -2.75342 | -2.29673 | -0.00019 |
|    | Cu              | -0.85602 | 1.24575  | 0.12392  |          | Cu              | 0.41607  | -0.00041 | 1.24920  |
|    | C               | -2.51735 | 1.96276  | -0.06855 |          | Cu              | -1.25714 | 1.24433  | -0.00099 |
|    | C               | -2.40532 | -2.09333 | -0.07594 |          | Cu              | 2.55557  | 0.02593  | 0.00260  |
|    | O               | -3.49791 | -2.44969 | -0.16639 |          | C               | -2.77880 | 2.26755  | 0.00008  |
|    | O               | -3.62773 | 2.26188  | -0.14841 |          | O               | -3.77576 | 2.84180  | 0.00121  |
|    |                 |          |          | O        | -3.76832 | -2.83890        | 0.00300  |          |          |
| 6C | Cu              | 0.25629  | -0.29151 | 1.35943  | 7C       | Cu              | -2.17168 | 0.05754  | 0.01849  |
|    | Cu              | 1.91029  | -1.10252 | -0.54182 |          | Cu              | 1.72081  | 0.58024  | -1.29989 |
|    | Cu              | -0.43611 | -1.64234 | -0.52948 |          | Cu              | -0.19547 | 1.35993  | -0.08881 |
|    | Cu              | 2.24126  | 0.97237  | 0.63271  |          | Cu              | 1.91028  | -1.45589 | 0.09130  |
|    | Cu              | -1.81361 | 0.33442  | 0.07082  |          | C               | -3.22913 | -1.41398 | 0.00322  |
|    | Cu              | 0.37094  | 0.69777  | -0.85145 |          | Cu              | -0.07114 | -0.70326 | 1.29401  |
|    | C               | -1.11567 | 2.00951  | -0.63243 |          | Cu              | -0.15154 | -0.96258 | -1.08409 |
|    | C               | -3.50996 | -0.27921 | 0.29414  |          | Cu              | 1.82039  | 0.83398  | 1.08412  |
|    | O               | -4.53833 | -0.72531 | 0.57082  |          | C               | -2.27568 | 1.93664  | -0.01928 |
|    | O               | -1.16030 | 3.16793  | -0.82538 |          | O               | -2.46853 | 3.08644  | -0.03337 |
|    |                 |          |          | O        | -3.77635 | -2.42701        | -0.00945 |          |          |
| 6D | Cu              | 0.38833  | -0.04987 | -1.22620 | 7D       | Cu              | 1.07330  | 1.24070  | 0.60595  |
|    | Cu              | 0.40906  | -1.29538 | 0.81071  |          | Cu              | -0.98514 | -2.17103 | -0.10769 |
|    | Cu              | 1.21764  | 1.00584  | 0.89906  |          | Cu              | 2.61919  | -0.05694 | -0.79387 |
|    | Cu              | 2.57665  | -0.56354 | -0.27634 |          | Cu              | -2.31043 | -0.01283 | -0.65590 |
|    | Cu              | -1.18071 | 0.81306  | 0.57668  |          | C               | -0.94423 | 1.21437  | 0.01073  |
|    | Cu              | -1.70718 | -1.27432 | -0.42927 |          | Cu              | 0.09807  | -0.13887 | -1.10491 |
|    | C               | 0.21765  | 1.87529  | -0.62171 |          | Cu              | -0.92728 | -0.20911 | 1.31264  |
|    | C               | -3.02663 | 0.18242  | 0.17043  |          | Cu              | 1.18148  | -1.25672 | 0.72702  |
|    | O               | -4.17544 | 0.43064  | 0.10812  |          | C               | -0.83560 | 2.69583  | -0.00251 |
|    | O               | 0.10597  | 2.97137  | -1.05525 |          | O               | 0.29704  | 3.06558  | 0.55237  |
|    |                 |          |          | O        | -1.67803 | 3.44418         | -0.49777 |          |          |

|    |    |          |          |          |          |          |          |          |          |
|----|----|----------|----------|----------|----------|----------|----------|----------|----------|
| 6E | Cu | 0.40987  | -0.35702 | -1.35557 | 7E       | Cu       | 0.66491  | -1.67933 | -0.34508 |
|    | Cu | 0.71831  | -1.27068 | 0.80910  |          | Cu       | -2.04941 | 0.85545  | -0.30702 |
|    | Cu | 0.88786  | 1.33046  | 0.31626  |          | Cu       | 2.73369  | -0.34537 | -0.14380 |
|    | Cu | 2.63219  | -0.24657 | -0.36827 |          | Cu       | -0.87862 | -0.59031 | 1.40785  |
|    | Cu | -1.40290 | 1.16922  | -0.62374 |          | C        | -0.83692 | -0.56519 | -0.55074 |
|    | Cu | -0.84560 | 0.32565  | 1.63284  |          | Cu       | 0.55522  | 0.78267  | -0.14883 |
|    | C  | -1.04629 | -0.76957 | -0.07132 |          | Cu       | -2.34213 | -1.64333 | -0.27145 |
|    | C  | -2.47171 | -1.04659 | -0.40791 |          | Cu       | 2.58664  | 2.01228  | 0.12113  |
|    | O  | -3.03467 | 0.04636  | -0.88797 |          | C        | -3.20655 | 2.23739  | -0.28853 |
|    | O  | -3.02586 | -2.13184 | -0.24112 |          | O        | -3.97855 | 3.08697  | -0.23388 |
|    |    |          |          | O        | 2.40624  | -2.13734 | -0.27059 |          |          |
| 6F | Cu | -0.04024 | -1.54554 | -0.20714 | 7F       | Cu       | 2.56174  | 1.00253  | 0.26238  |
|    | Cu | -0.89094 | 0.80534  | -0.19917 |          | Cu       | -2.02974 | -0.07642 | 0.05950  |
|    | Cu | 1.00827  | 0.16006  | 1.39889  |          | Cu       | 0.15487  | 0.81661  | 1.07223  |
|    | Cu | -2.37761 | -1.13833 | -0.07692 |          | Cu       | 0.04837  | -1.57541 | 0.04490  |
|    | Cu | 2.46512  | -0.91457 | -0.34513 |          | C        | 1.22323  | -0.14657 | -0.30073 |
|    | Cu | 2.09606  | 1.55201  | -0.42897 |          | Cu       | -0.11102 | 0.82775  | -1.29780 |
|    | C  | 0.89908  | 0.10748  | -0.54099 |          | Cu       | 2.56975  | -1.42914 | -0.19324 |
|    | C  | -2.84332 | 1.30107  | -0.07136 |          | Cu       | -1.52787 | 2.31264  | 0.00129  |
|    | O  | -3.69380 | 0.35098  | 0.08807  |          | C        | -2.48758 | -2.01303 | 0.12617  |
|    | O  | -3.04291 | 2.51139  | -0.14199 |          | O        | -1.43979 | -2.79077 | 0.15245  |
|    |    |          |          | O        | -3.65153 | -2.39930 | 0.16237  |          |          |

**Table S3.** Cartesian coordinates of structures on Figure 5

|                                             | XYZ Coordinates |          |          |          |                                             | XYZ Coordinates |          |          |          |
|---------------------------------------------|-----------------|----------|----------|----------|---------------------------------------------|-----------------|----------|----------|----------|
| Cu <sub>6</sub> C <sup>-</sup>              | Cu              | -2.37172 | -0.90704 | 0.55130  | Cu <sub>7</sub> C <sup>-</sup>              | Cu              | 0.08161  | -1.65264 | 0.57266  |
|                                             | Cu              | -0.78433 | -0.38280 | -1.35530 |                                             | Cu              | -2.12030 | -0.72800 | 0.75262  |
|                                             | Cu              | 0.83070  | 1.09638  | 0.04441  |                                             | Cu              | -0.87763 | -0.30246 | -1.22355 |
|                                             | Cu              | -1.61678 | 1.41943  | 0.22885  |                                             | Cu              | 1.61849  | -0.53700 | -1.13439 |
|                                             | Cu              | 0.99836  | -1.23144 | 0.30498  |                                             | Cu              | 0.19313  | 0.86079  | 0.56081  |
|                                             | Cu              | 3.07056  | 0.04491  | 0.11172  |                                             | Cu              | -2.02603 | 1.59668  | -0.22185 |
|                                             | C               | -0.61285 | -0.19065 | 0.55117  |                                             | Cu              | 2.80255  | 0.86651  | 0.53693  |
|                                             |                 |          |          | C        | 1.58617                                     | -0.50211        | 0.75770  |          |          |
| Cu <sub>5</sub> C <sub>2</sub> <sup>-</sup> | Cu              | 0.00019  | -0.07097 | 0.00415  | Cu <sub>6</sub> C <sub>2</sub> <sup>-</sup> | Cu              | 2.16603  | -0.97491 | 0.01373  |
|                                             | Cu              | -2.15481 | 0.98804  | -0.00070 |                                             | Cu              | -2.24986 | 1.39903  | 0.00872  |
|                                             | Cu              | 2.15513  | 0.98781  | -0.00180 |                                             | Cu              | -2.16353 | -0.97825 | -0.00626 |
|                                             | Cu              | -2.04696 | -1.38639 | -0.00144 |                                             | Cu              | 0.00241  | -2.09481 | -0.00394 |
|                                             | Cu              | 2.04636  | -1.38681 | -0.00035 |                                             | Cu              | -0.00022 | 0.27402  | -0.00294 |
|                                             | C               | -0.63248 | 2.09826  | -0.00025 |                                             | Cu              | 2.24620  | 1.40249  | -0.01004 |
|                                             | C               | 0.63293  | 2.09856  | 0.00090  |                                             | C               | -0.63523 | 2.34965  | 0.00601  |
|                                             |                 |          |          | C        | 0.63019                                     | 2.35040         | -0.00250 |          |          |

Table S4. Cartesian coordinates of structures Figure 6

| #  | XYZ Coordinates |          |          |          | #        | XYZ Coordinates |          |          |          |
|----|-----------------|----------|----------|----------|----------|-----------------|----------|----------|----------|
| 5A | Cu              | -0.42851 | -0.89254 | -1.08187 | 6.2A     | Cu              | -1.32727 | -1.34845 | -0.24422 |
|    | Cu              | 1.07945  | -1.15495 | 0.97793  |          | Cu              | 2.14123  | 0.42346  | -1.23996 |
|    | Cu              | 1.85545  | -0.25902 | -1.20396 |          | Cu              | 0.96626  | -0.94713 | 0.43340  |
|    | C               | -1.80222 | 0.29636  | -0.30346 |          | C               | -3.16467 | 0.98457  | -0.57609 |
|    | Cu              | -1.22731 | -0.72169 | 1.27859  |          | Cu              | -0.17508 | 0.84644  | -0.96670 |
|    | C               | -2.93415 | 0.75697  | -0.70821 |          | C               | -2.02363 | 0.44572  | -0.29863 |
|    | Cu              | 0.06283  | 1.05491  | 0.18464  |          | Cu              | -0.86561 | 0.62275  | 1.33472  |
|    | C               | 1.12574  | 2.46475  | 0.57984  |          | Cu              | 1.40296  | 1.29856  | 1.01800  |
|    | O               | 1.83617  | 3.33420  | 0.82756  |          | C               | 0.00757  | -2.67131 | 0.09878  |
|    | O               | -3.99261 | 1.18038  | -1.06680 |          | O               | 0.33360  | -3.80419 | 0.18434  |
|    |                 |          |          | O        | -4.21457 | 1.48829         | -0.81765 |          |          |
| 5B | Cu              | -0.93721 | -1.53716 | -0.00101 | 6.2B     | Cu              | -0.50173 | -0.52754 | 1.49176  |
|    | Cu              | 0.50279  | 2.49423  | -0.00085 |          | Cu              | 2.95950  | 0.47256  | -0.39278 |
|    | Cu              | -3.10315 | -0.59331 | 0.00072  |          | Cu              | -1.35820 | 1.65923  | 1.19035  |
|    | C               | 2.07016  | -1.70538 | -0.00165 |          | C               | -0.86695 | -3.10899 | 0.02167  |
|    | Cu              | 1.23831  | 0.24167  | -0.00083 |          | Cu              | 1.18003  | -1.07473 | -0.33280 |
|    | C               | 0.86300  | -2.01688 | -0.00163 |          | C               | -0.56055 | -1.85481 | 0.03125  |
|    | Cu              | -1.15791 | 0.82840  | 0.00131  |          | Cu              | -1.22241 | -0.15234 | -0.78178 |
|    | C               | 3.42954  | -1.10332 | -0.00002 |          | Cu              | 0.70390  | 1.26805  | 0.03542  |
|    | O               | 4.46209  | -1.76385 | 0.00263  |          | C               | -2.10891 | 0.77535  | -2.06858 |
|    | O               | 3.29813  | 0.18540  | 0.00225  |          | O               | -2.57011 | 1.43875  | -2.89117 |
|    |                 |          |          | O        | -1.16148 | -4.26138        | 0.01608  |          |          |
| 5C | Cu              | 2.60718  | -0.77769 | 0.00124  | 6.2C     | Cu              | 2.50613  | 1.13088  | -0.21447 |
|    | Cu              | -2.15249 | 0.86998  | -0.00645 |          | Cu              | -3.60345 | -0.37535 | -0.49483 |
|    | Cu              | -0.22788 | 2.28322  | 0.00586  |          | Cu              | 1.95970  | -1.31493 | 0.02923  |
|    | C               | -0.09626 | -2.14501 | 0.00696  |          | C               | -0.30394 | 2.25341  | 0.16011  |
|    | Cu              | -1.86627 | -1.60778 | -0.00211 |          | Cu              | -1.90490 | 1.23989  | -0.04743 |
|    | C               | 1.14526  | -1.88747 | 0.00975  |          | C               | 0.95868  | 2.20360  | 0.10102  |
|    | Cu              | 0.08638  | -0.05859 | 0.00916  |          | Cu              | 0.28274  | 0.34102  | 0.71251  |
|    | C               | 4.11120  | 0.19409  | -0.01059 |          | Cu              | -1.48589 | -1.20851 | 0.10530  |
|    | O               | 5.05629  | 0.84396  | -0.01878 |          | C               | 3.59209  | -0.48133 | -0.51940 |
|    | O               | -3.29655 | -0.53581 | -0.01374 |          | O               | 4.70305  | -0.74714 | -0.85754 |
|    |                 |          |          | O        | 0.25241  | -1.55672        | 0.72386  |          |          |
| 5D | Cu              | -0.23719 | -1.51012 | -0.00064 | 6.2D     | Cu              | 2.73894  | -1.36046 | -0.00219 |
|    | Cu              | -0.33071 | 2.74817  | -0.00345 |          | Cu              | -1.67229 | 0.92730  | -0.00642 |
|    | Cu              | -2.67600 | -1.32262 | -0.00068 |          | Cu              | 2.62623  | 1.02083  | -0.00235 |
|    | C               | 2.44930  | -0.55158 | 0.00023  |          | C               | -0.11518 | -2.23089 | -0.00018 |
|    | Cu              | 1.03645  | 0.80500  | 0.00456  |          | Cu              | -1.85141 | -1.61394 | 0.00198  |
|    | C               | 1.70505  | -1.81287 | -0.00169 |          | C               | 1.14424  | -2.34502 | -0.00080 |
|    | Cu              | -1.38292 | 0.63604  | 0.00191  |          | Cu              | 0.49841  | -0.24592 | 0.00365  |
|    | C               | 3.73319  | -0.32099 | -0.00076 |          | Cu              | 0.42283  | 2.10677  | 0.00558  |
|    | O               | 4.86282  | 0.02037  | -0.00188 |          | C               | -3.57648 | 0.30530  | -0.00155 |
|    | O               | 2.23665  | -2.92344 | -0.00260 |          | O               | -4.45009 | 1.15390  | -0.00408 |
|    |                 |          |          | O        | -3.65420 | -0.97628        | 0.00502  |          |          |
| 5E | Cu              | 2.02819  | -0.64373 | -0.00058 | 6.2E     | Cu              | 2.65152  | 0.90014  | 0.01655  |
|    | Cu              | -1.99819 | 1.51532  | -0.00037 |          | Cu              | -3.59446 | -0.37640 | 0.02095  |
|    | Cu              | 0.85667  | 1.65030  | -0.00013 |          | Cu              | 0.60568  | 2.24435  | -0.00043 |
|    | C               | -1.22253 | -2.15782 | 0.00032  |          | C               | 0.29484  | -2.08381 | -0.01087 |
|    | Cu              | -2.65437 | -0.87867 | -0.00178 |          | Cu              | -1.52068 | -1.48800 | -0.00363 |
|    | C               | 0.05554  | -2.23269 | 0.00038  |          | C               | 1.53487  | -1.86882 | -0.00913 |
|    | Cu              | -0.41425 | -0.23103 | 0.00340  |          | Cu              | 0.49236  | -0.06623 | -0.02739 |
|    | C               | 3.72638  | 0.02278  | -0.00179 |          | Cu              | -1.62548 | 1.03829  | -0.00970 |
|    | O               | 4.68582  | 0.66167  | -0.00098 |          | C               | 3.02064  | -1.90948 | 0.00566  |
|    | O               | 1.30423  | -2.50505 | -0.00019 |          | O               | 3.62889  | -0.76211 | 0.01732  |
|    |                 |          |          | O        | 3.57592  | -3.00535        | 0.00668  |          |          |
| 5F | Cu              | 2.57937  | -0.93682 | 0.19907  | 6.2F     | Cu              | 3.15550  | 0.22313  | -0.01310 |
|    | Cu              | -1.53000 | 1.21514  | 0.00678  |          | Cu              | -3.22762 | 0.18497  | -0.02052 |
|    | Cu              | 2.00316  | 1.43779  | 0.17631  |          | Cu              | 1.37289  | 1.89448  | 0.00444  |
|    | C               | -0.19249 | -2.22509 | -0.09037 |          | C               | 1.73321  | -2.32997 | -0.01629 |
|    | Cu              | -1.81833 | -1.23959 | 0.05762  |          | Cu              | -1.36135 | -1.28070 | -0.00082 |
|    | C               | 1.07322  | -2.11866 | -0.05906 |          | C               | 2.80579  | -1.65635 | -0.02591 |
| Cu | 0.37358         | -0.18991 | -0.44134 | Cu       | 0.85279  | -0.41118        | 0.01119  |          |          |



|   |          |         |          |    |          |          |         |
|---|----------|---------|----------|----|----------|----------|---------|
| C | -3.14477 | 0.43971 | 0.23344  | Cu | -0.96511 | 1.17670  | 0.01605 |
| O | -4.28255 | 0.16272 | 0.34560  | C  | 0.30748  | -2.49548 | 0.00803 |
| O | 0.15238  | 1.72633 | -0.40292 | O  | -0.37747 | -3.51299 | 0.03233 |
|   |          |         |          | O  | -2.63061 | 1.89503  | 0.00329 |

**Table S5** Cartesian coordinates of structures on Figure 7a

| # | XYZ Coordinates |          |          | #        | XYZ Coordinates |          |          |          |          |
|---|-----------------|----------|----------|----------|-----------------|----------|----------|----------|----------|
| 1 | Cu              | -0.89612 | 0.82356  | -0.21241 | 2               | Cu       | -0.02170 | -1.56212 | -0.21384 |
|   | Cu              | 0.98567  | 0.13193  | 1.41062  |                 | Cu       | -0.89612 | 0.82356  | -0.21241 |
|   | Cu              | -2.35053 | -1.14173 | -0.07201 |                 | Cu       | 0.98567  | 0.13193  | 1.41062  |
|   | Cu              | 2.48558  | -0.87101 | -0.35856 |                 | Cu       | -2.35053 | -1.14173 | -0.07201 |
|   | Cu              | 2.07823  | 1.55700  | -0.41305 |                 | Cu       | 2.48558  | -0.87101 | -0.35856 |
|   | C               | 0.88199  | 0.10695  | -0.52312 |                 | Cu       | 2.07823  | 1.55700  | -0.41305 |
| 3 | Cu              | -0.25302 | -1.67641 | -0.14596 | C               | 0.88199  | 0.10695  | -0.52312 |          |
|   | Cu              | -0.73477 | 0.79173  | -0.15227 | C               | -2.86525 | 1.28318  | -0.07267 |          |
|   | Cu              | 1.15557  | -0.10833 | 1.42574  | O               | -3.70372 | 0.31630  | 0.03702  |          |
|   | Cu              | -2.53528 | -1.03443 | -0.14101 | O               | -3.07791 | 2.49224  | -0.10034 |          |
|   | Cu              | 2.74276  | -0.67564 | -0.48206 | 4               | Cu       | -0.35762 | -1.49103 | -0.20346 |
|   | Cu              | 1.74748  | 1.52396  | -0.42773 |                 | Cu       | -0.67916 | 1.00064  | -0.08628 |
|   | C               | 0.90235  | -0.20557 | -0.47447 |                 | Cu       | 1.12716  | -0.15681 | 1.35575  |
|   | C               | -2.06496 | 2.07118  | 0.06073  |                 | Cu       | -2.61448 | -0.49879 | -0.07996 |
| O | -4.00058        | -0.03691 | -0.17029 | Cu       |                 | 2.67188  | -0.72244 | -0.51056 |          |
| O | -2.82239        | 2.91204  | 0.20247  | Cu       |                 | 1.71554  | 1.56565  | -0.30098 |          |
|   |                 |          |          | C        |                 | 0.89884  | -0.12702 | -0.59456 |          |
|   |                 |          |          | C        |                 | -2.73927 | 1.35711  | -0.04424 |          |
|   |                 |          |          | O        | -3.32998        | 2.38282  | -0.03053 |          |          |
|   |                 |          |          | O        | -2.04421        | -2.20780 | -0.12302 |          |          |

**Table S6.** Cartesian coordinates of structures on Figure 7b

| # | XYZ Coordinates |          |           | #        | XYZ Coordinates |          |          |          |          |
|---|-----------------|----------|-----------|----------|-----------------|----------|----------|----------|----------|
| 1 | Cu              | 0.08169  | -1.65272  | 0.57281  | 2               | Cu       | -2.70242 | 0.02841  | 0.29896  |
|   | Cu              | -2.12020 | -0.72764  | 0.75311  |                 | Cu       | -0.63974 | 0.32676  | -1.19401 |
|   | Cu              | -0.87763 | -1.030290 | -1.22374 |                 | Cu       | 0.63786  | -1.17086 | 0.52553  |
|   | Cu              | 1.61888  | -0.53728  | -1.13415 |                 | Cu       | -1.48513 | -1.89672 | -0.49630 |
|   | Cu              | 0.19322  | 0.86103   | 0.56053  |                 | Cu       | 1.72482  | 0.75805  | -0.40483 |
|   | Cu              | -2.02643 | 1.59638   | -0.22226 |                 | Cu       | 3.02758  | -1.09929 | 0.21322  |
|   | Cu              | 2.80237  | 0.86690   | 0.53694  |                 | Cu       | -0.54343 | 1.04203  | 1.07268  |
|   | C               | 1.58582  | -0.50158  | 0.75771  |                 | C        | -1.19239 | -0.83174 | 1.02601  |
| 3 | Cu              | -2.68731 | 0.20932   | 0.28100  | C               | 0.14633  | 2.63684  | 0.10343  |          |
|   | Cu              | -0.75674 | -0.02406  | -1.33488 | O               | 0.21813  | 3.84216  | 0.25134  |          |
|   | Cu              | 0.61733  | -1.02329  | 0.67603  | O               | 0.49556  | 2.09606  | -1.15374 |          |
|   | Cu              | -1.59439 | -1.92615  | -0.01631 | 4               | Cu       | -2.88919 | -0.12552 | 0.17562  |
|   | Cu              | 1.75171  | 0.45174   | -0.86304 |                 | Cu       | -0.69652 | -0.27279 | -1.28742 |
|   | Cu              | 3.01775  | -1.04532  | 0.46277  |                 | Cu       | 0.69274  | -0.82854 | 0.80132  |
|   | Cu              | -0.39627 | 1.30331   | 0.63615  |                 | Cu       | -1.41404 | -2.06415 | 0.30835  |
|   | C               | -1.18538 | -0.49422  | 1.14099  |                 | Cu       | 1.84009  | 0.36497  | -0.96808 |
|   | C               | 0.15526  | 3.03962   | 0.80291  |                 | Cu       | 3.09294  | -0.75653 | 0.69112  |
|   | O               | 0.53076  | 4.11940   | 0.76746  |                 | Cu       | -0.22401 | 1.71779  | -0.10147 |
| O | 0.41553         | 1.41889  | -1.65159  | C        |                 | -1.11877 | -0.23524 | 0.67409  |          |
|   |                 |          |           | C        |                 | -0.49110 | 3.03381  | 1.08562  |          |
|   |                 |          |           | O        |                 | -0.71793 | 3.78745  | 1.92189  |          |
|   |                 |          |           | O        | 0.46801         | 1.23592  | -1.86214 |          |          |

## References

---

- <sup>i</sup> Höltzl, T., Veldeman, N., De Haec, J., Veszpremi, T., Lievens, P., & Nguyen, M. T. (2009). Growth Mechanism and Chemical Bonding in Scandium-Doped Copper Clusters: Experimental and Theoretical Study in Concert. *Chemistry—A European Journal*, 15(16), 3970-3982.
- <sup>ii</sup> Wang, Y., Lv, J., Zhu, L., & Ma, Y. (2012). CALYPSO: A method for crystal structure prediction. *Computer Physics Communications*, 183(10), 2063-2070.
- <sup>iii</sup> Wang, Y., Lv, J., Zhu, L., & Ma, Y. (2010). Crystal structure prediction via particle-swarm optimization. *Physical Review B*, 82(9), 094116.
- <sup>iv</sup> Lv, J., Wang, Y., Zhu, L., & Ma, Y. (2012). Particle-swarm structure prediction on clusters. *The Journal of chemical physics*, 137(8), 084104.
- <sup>v</sup> Gaussian 16, Revision C.01, M. J. Frisch, G. W. Trucks, H. B. Schlegel, G. E. Scuseria, M. A. Robb, J. R. Cheeseman, G. Scalmani, V. Barone, G. A. Petersson, H. Nakatsuji, X. Li, M. Caricato, A. V. Marenich, J. Bloino, B. G. Janesko, R. Gomperts, B. Mennucci, H. P. Hratchian, J. V. Ortiz, A. F. Izmaylov, J. L. Sonnenberg, D. Williams-Young, F. Ding, F. Lipparini, F. Egidi, J. Goings, B. Peng, A. Petrone, T. Henderson, D. Ranasinghe, V. G. Zakrzewski, J. Gao, N. Rega, G. Zheng, W. Liang, M. Hada, M. Ehara, K. Toyota, R. Fukuda, J. Hasegawa, M. Ishida, T. Nakajima, Y. Honda, O. Kitao, H. Nakai, T. Vreven, K. Throssell, J. A. Montgomery, Jr., J. E. Peralta, F. Ogliaro, M. J. Bearpark, J. J. Heyd, E. N. Brothers, K. N. Kudin, V. N. Staroverov, T. A. Keith, R. Kobayashi, J. Normand, K. Raghavachari, A. P. Rendell, J. C. Burant, S. S. Iyengar, J. Tomasi, M. Cossi, J. M. Millam, M. Klene, C. Adamo, R. Cammi, J. W. Ochterski, R. L. Martin, K. Morokuma, O. Farkas, J. B. Foresman, and D. J. Fox, Gaussian, Inc., Wallingford CT, 2016.
- <sup>vi</sup> Verstraelen, T: Molmod software Library, <https://molmod.ugent.be/software>
- <sup>vii</sup> Lushchikova, O. V., Szalay, M., Tahmasbi, H., Juurlink, L. B., Meyer, J., Höltzl, T., & Bakker, J. M. (2021). IR spectroscopic characterization of the co-adsorption of CO 2 and H 2 onto cationic Cu n+ clusters. *Physical Chemistry Chemical Physics*, 23(47), 26661-26673.
- <sup>viii</sup> Szalay, M., Buzsáki, D., Barabás, J., Faragó, E., Janssens, E., Nyulászi, L., & Höltzl, T. (2021). Screening of transition metal doped copper clusters for CO 2 activation. *Physical Chemistry Chemical Physics*, 23(38), 21738-21747.
- <sup>ix</sup> Barabás, J., Ferrari, P., Kaydashev, V., Vanbuel, J., Janssens, E., & Höltzl, T. (2021). The effect of size, charge state and composition on the binding of propene to yttrium-doped gold clusters. *RSC advances*, 11(47), 29186-29195.
- <sup>x</sup> Barabás, J., Vanbuel, J., Ferrari, P., Janssens, E., & Höltzl, T. (2019). Non-covalent Interactions and Charge Transfer between Propene and Neutral Yttrium-Doped and Pure Gold Clusters. *Chemistry—A European Journal*, 25(69), 15795-15804.
- <sup>xi</sup> Hou, G. L., Faragó, E., Buzsáki, D., Nyulászi, L., Höltzl, T., & Janssens, E. (2021). Observation of the reaction intermediates of methanol dehydrogenation by cationic vanadium clusters. *Angewandte Chemie International Edition*, 60(9), 4756-4763.
- <sup>xii</sup> Grimme, S., Antony, J., Ehrlich, S., & Krieg, H. (2010). A consistent and accurate ab initio parametrization of density functional dispersion correction (DFT-D) for the 94 elements H-Pu. *The Journal of chemical physics*, 132(15), 154104.
- <sup>xiii</sup> Witte, J., Mardirossian, N., Neaton, J. B., & Head-Gordon, M. (2017). Assessing DFT-D3 damping functions across widely used density functionals: Can we do better?. *Journal of chemical theory and computation*, 13(5), 2043-2052.
- <sup>xiv</sup> Caldeweyher, E., Bannwarth, C., & Grimme, S. (2017). Extension of the D3 dispersion coefficient model. *The Journal of chemical physics*, 147(3), 034112.
- <sup>xv</sup> Caldeweyher, E., Ehlert, S., Hansen, A., Neugebauer, H., Spicher, S., Bannwarth, C., & Grimme, S. (2019). A generally applicable atomic-charge dependent London dispersion correction. *The Journal of chemical physics*, 150(15), 154122.
